# Supplementary material
Source: PubMed Central journal article supplement (PMC3781982)
Supplement: 4d92935ffb88b9f5430a3b053e696bc4_genetics.113.150078-2.pdf [file 4d92935ffb88b9f5430a3b053e696bc4_genetics.113.150078-2.pdf]

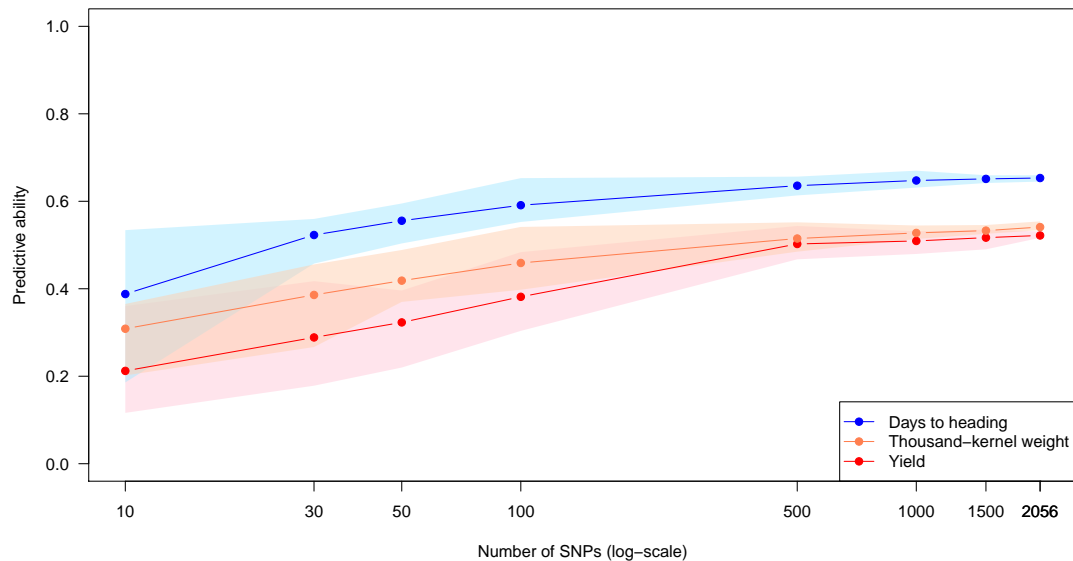

**Figure S4** Predictive ability for marker subsets in the wheat data set. The predictive ability was estimated with fivefold cross-validation and 10 replications using RR-BLUP. Average predictive ability as a function of the number of randomly selected markers is visualized as a straight line for each trait. Shaded areas indicate the range of 10 different marker subsets.
