# Supplementary material
Source: PubMed Central journal article supplement (PMC3781982)
Supplement: 6e31f5570e2c871091bc787bbdb0fc11_genetics.113.150078-9.pdf [file 6e31f5570e2c871091bc787bbdb0fc11_genetics.113.150078-9.pdf]

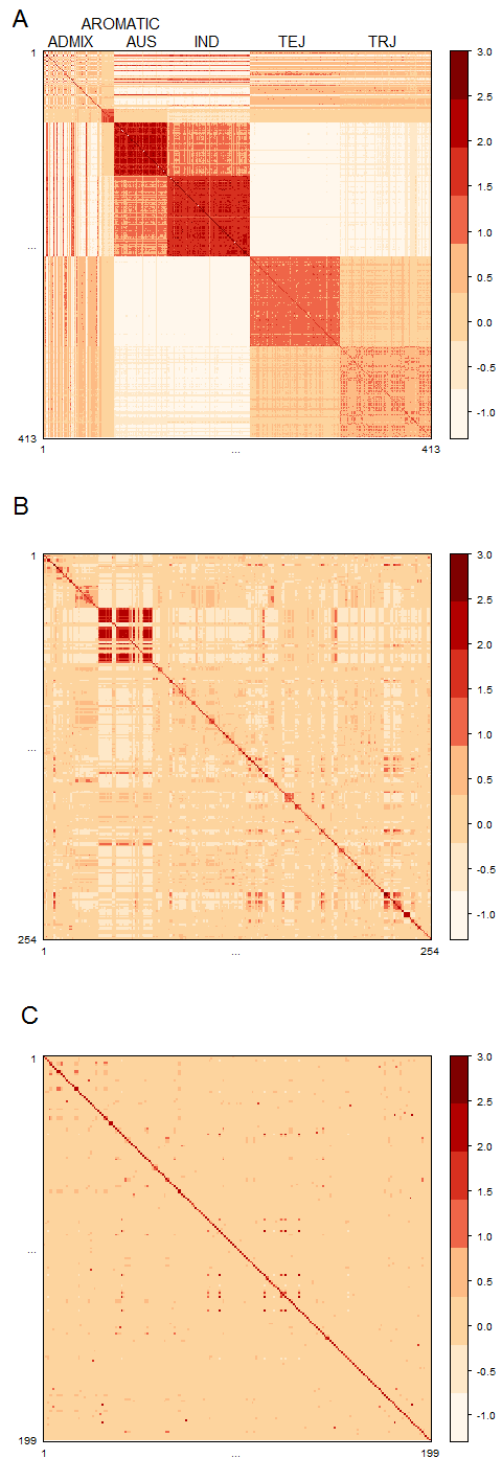

**Figure S1** Heat map of the elements of the realized relationship matrix estimated according to Habier et al. (2007) for (A) the 413 rice genotypes where individuals are ordered by subpopulations (ADMIX ( $n = 62$ ), AROMATIC ( $n = 14$ ), AUS ( $n = 57$ ), IND ( $n = 87$ ), TEJ ( $n = 96$ ), and TRJ ( $n = 97$ )), (B) for the 254 wheat genotypes, and (C) for the 199 *Arabidopsis* genotypes.
