# Supplementary material
Source: PubMed Central journal article supplement (PMC3781982)
Supplement: 69fd1dbe0cac97b47447bb83277aa5ea_genetics.113.150078-10.pdf [file 69fd1dbe0cac97b47447bb83277aa5ea_genetics.113.150078-10.pdf]

## SUPPORTING TABLES

**Table S1** Network densities for the experimental data sets and different  $r^2$  thresholds.

|              | Rice                                                              | Wheat               | <i>Arabidopsis</i>                                                |
|--------------|-------------------------------------------------------------------|---------------------|-------------------------------------------------------------------|
| $r^2 > 0.75$ | $7.7 \cdot 10^{-3}$<br>[ $7.0 \cdot 10^{-3}, 8.3 \cdot 10^{-3}$ ] | $2.8 \cdot 10^{-4}$ | $1.4 \cdot 10^{-5}$<br>[ $1.1 \cdot 10^{-5}, 1.5 \cdot 10^{-5}$ ] |
| $r^2 > 0.50$ | $5.4 \cdot 10^{-2}$<br>[ $4.5 \cdot 10^{-2}, 6.1 \cdot 10^{-2}$ ] | $1.5 \cdot 10^{-3}$ | $5.3 \cdot 10^{-5}$<br>[ $3.4 \cdot 10^{-5}, 8.2 \cdot 10^{-5}$ ] |
| $r^2 > 0.25$ | $2.0 \cdot 10^{-1}$<br>[ $1.8 \cdot 10^{-1}, 2.1 \cdot 10^{-1}$ ] | $9.1 \cdot 10^{-3}$ | $2.9 \cdot 10^{-4}$<br>[ $2.2 \cdot 10^{-5}, 3.9 \cdot 10^{-4}$ ] |

Average network densities (ratio of observed to potential edges) and range for three LD thresholds measured as  $r^2$  (based on 100 samples of 2,000 randomly selected SNPs for the rice and *Arabidopsis* data sets and all 2,056 SNP markers for wheat).
