# Supplementary material
Source: PubMed Central journal article supplement (PMC3781982)
Supplement: 3365e4f07fd95c7d6f00cd83b4973a61_genetics.113.150078-8.pdf [file 3365e4f07fd95c7d6f00cd83b4973a61_genetics.113.150078-8.pdf]

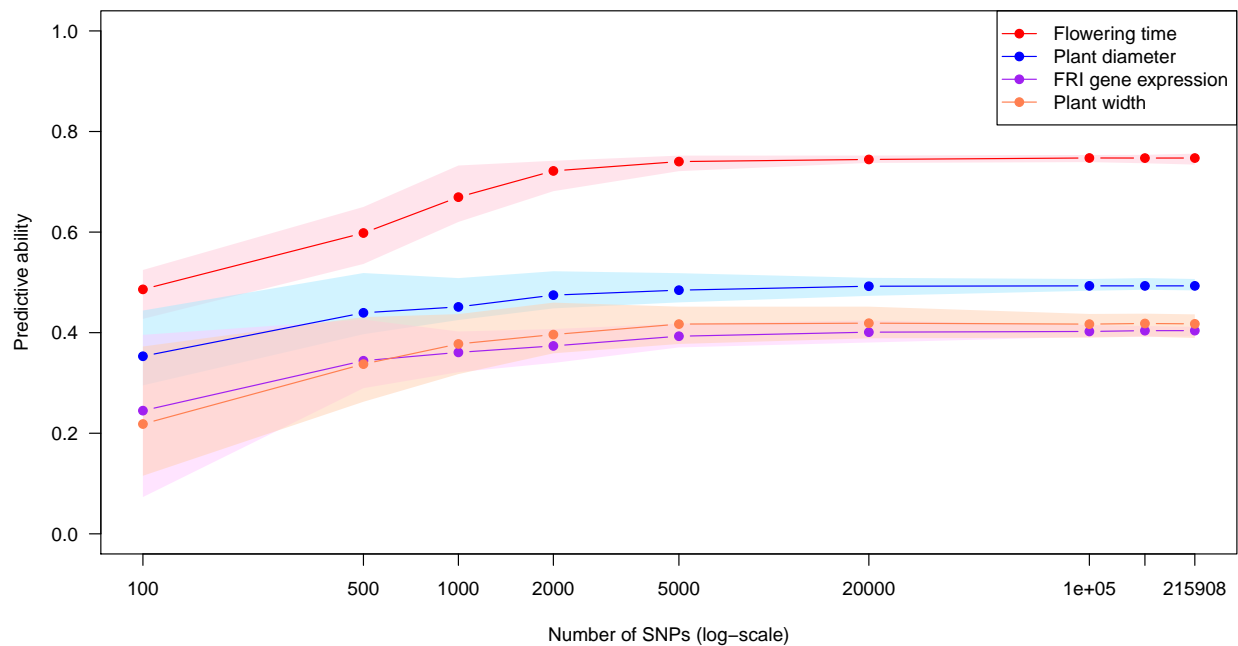

**Figure S5** Predictive ability for marker subsets in the *Arabidopsis* data set. The predictive ability was estimated with fivefold cross-validation and 10 replications using RR-BLUP. Average predictive ability as a function of the number of randomly selected markers is visualized as a straight line for each trait. Shaded areas indicate the range of 10 different marker subsets.
