# Supplementary material
Source: PubMed Central journal article supplement (PMC3781982)
Supplement: aea27cf404b22da2b47e447427d86afc_genetics.113.150078-6.pdf [file aea27cf404b22da2b47e447427d86afc_genetics.113.150078-6.pdf]

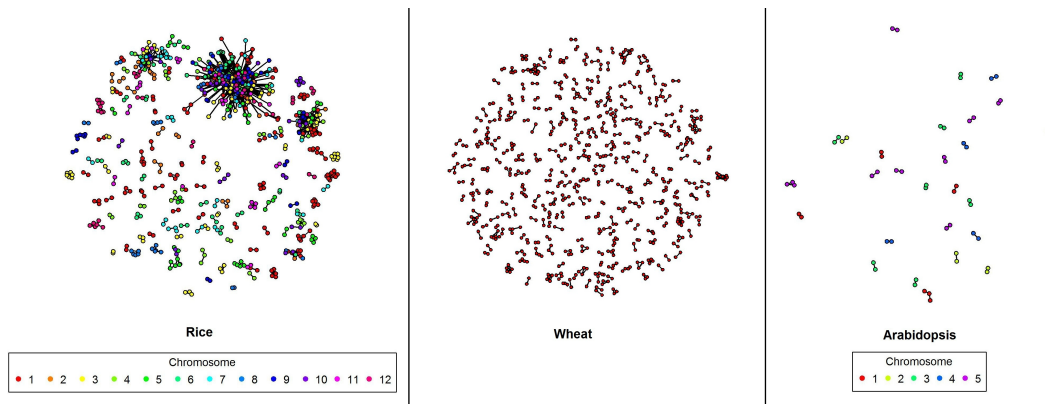

**Figure S2** Network visualization of pairwise LD between SNPs for the rice, wheat and *Arabidopsis* data set. Each vertex represents a SNP, where different colors denote different chromosomes (only for rice and *Arabidopsis* because no chromosome allocation was available for the wheat data set) and each edge represents a SNP pair with  $r^2 > 0.75$ . A sample of 2,000 randomly selected SNPs was used to construct the network for the rice and *Arabidopsis* data, respectively.
