# Supplementary material
Source: PubMed Central journal article supplement (PMC3781982)
Supplement: b6a6e65712bb15d0a0e4928199100df1_genetics.113.150078-3.pdf [file b6a6e65712bb15d0a0e4928199100df1_genetics.113.150078-3.pdf]

**Table S2** Number of selected variables with LASSO and the elastic net for three experimental data sets.

| Data               | Trait                  | <i>n</i> | LASSO       | Elastic net  |
|--------------------|------------------------|----------|-------------|--------------|
| Rice               | Flowering time         | 359      | 74.2 ± 6.1  | 246.8 ± 15.7 |
|                    | Plant height           | 383      | 137.5 ± 6.6 | 262.0 ± 3.5  |
|                    | Panicle length         | 375      | 91.5 ± 6.5  | 171.1 ± 10.6 |
|                    | Seed length            | 377      | 184.4 ± 7.8 | 299.8 ± 4.9  |
| Wheat              | Yield                  | 254      | 66.8 ± 3.8  | 104.1 ± 2.3  |
|                    | Thousand-kernel weight | 254      | 50.1 ± 2.7  | 78.1 ± 3.4   |
|                    | Days to heading        | 254      | 42.3 ± 0.5  | 55.7 ± 2.1   |
| <i>Arabidopsis</i> | Flowering time         | 180      | 133.7 ± 4.8 | 206.1 ± 4.2  |
|                    | Plant diameter         | 180      | 59.8 ± 4.9  | 109.0 ± 7.1  |
|                    | FRI gene expression    | 164      | 35.4 ± 3.1  | 84.8 ± 6.4   |
|                    | Plant width            | 176      | 103.0 ± 9.1 | 218.3 ± 8.3  |

The average number ± SE of selected variables was evaluated across 50 cross-validation runs.
