# Supplementary material
Source: PubMed Central journal article supplement (PMC3781982)
Supplement: b987d4e55c6a458b3619f68951bc96a5_genetics.113.150078-7.pdf [file b987d4e55c6a458b3619f68951bc96a5_genetics.113.150078-7.pdf]

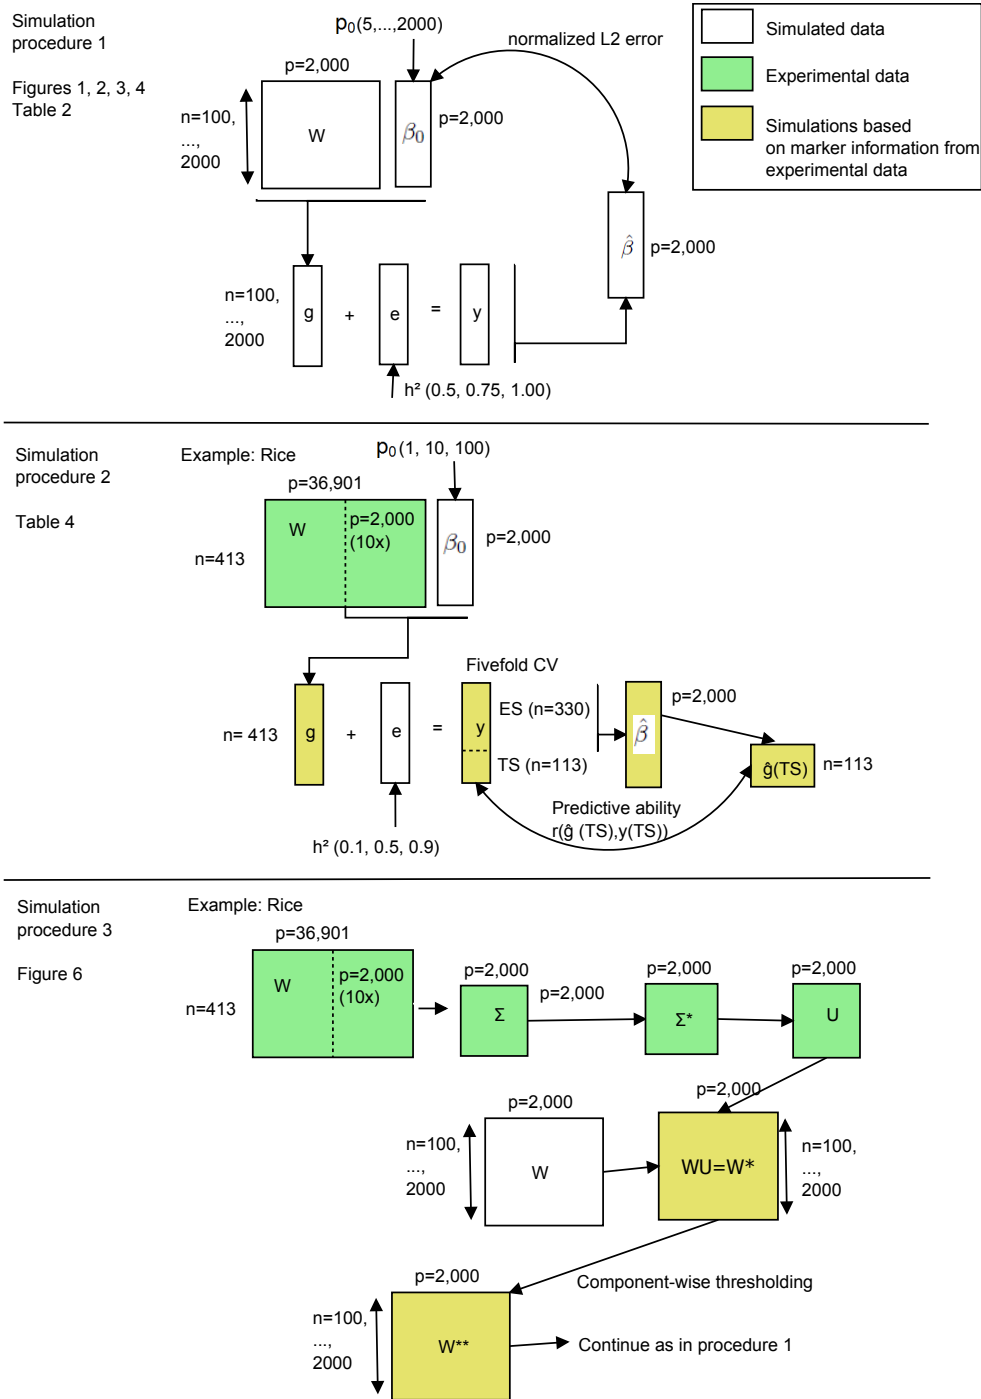

**Figure S6** Overview of simulation procedures. For each simulation procedure, the resulting Tables and Figures are given. Procedures 2 and 3 were also conducted for the wheat and *Arabidopsis* data sets, respectively. Dashed lines indicate random sampling of individuals or markers.
